# Supplementary material for: Temperature Dependent Effects of Elevated CO2 on Shell Composition and Mechanical Properties of Hydroides elegans: Insights from a Multiple Stressor Experiment
Source: PLoS One. 2013 Nov 12;8(11):e78945. doi: 10.1371/journal.pone.0078945 (PMC3827122; doi:10.1371/journal.pone.0078945)
Supplement: Table S3 — Results of 3-way analysis of variance (ANOVA) showing the effect of temperature (23°C and 29°C), salinity (27 and 34 ‰) and pH (8.1 and 7.8) on hardness (H) and Young’s modulus of elasticity (E) of the calcareous tube in Hydroides elegans . Significant effects (p<0.05) are indicated in bold. Data were square root transformed to improve homogeneity of variance. (DOCX) [file pone.0078945.s003.docx]

**Table S3**

Results of 3-way analysis of variance (ANOVA) showing the effect of temperature (23oC and 29oC), salinity (27 and 34 ‰) and pH (8.1 and 7.8) on hardness (H) and Young's modulus of elasticity (E) of the calcareous tube in *Hydroides elegans*. Significant effects (*p* < 0.05) are indicated in bold. Data were square root transformed to improve homogeneity of variance.

| Factor |  | **Hardness** | | | | | ***Elasticity*** | | | |
| --- | --- | --- | --- | --- | --- | --- | --- | --- | --- | --- |
|  | df | MS | F | p |  | MS | | F | p |  |
|  |  |  |  |  |  |  | |  |  |  |
| pH | 1 | 2.923 | 1.937 | 0.177 |  | 440.231 | | 1.329 | 0.260 |  |
| Salinity | 1 | 4.215 | 2.794 | 0.108 |  | 626.262 | | 1.891 | 0.182 |  |
| Temperature | 1 | 8.444 | **5.597** | 0.026 |  | 1881.850 | | **5.683** | 0.025 |  |
| pH × Salinity | 1 | 0.297 | 0.197 | 0.661 |  | 5.875 | | 0.018 | 0.895 |  |
| pH × Temperature | 1 | 1.454 | 0.963 | 0.336 |  | 256.348 | | 0.774 | 0.388 |  |
| Salinity × Temperature | 1 | 2.554 | 1.693 | 0.206 |  | 513.943 | | 1.552 | 0.225 |  |
| pH × Salinity × Temperature | 1 | 0.015 | 0.01 | 0.922 |  | 47.554 | | 0.144 | 0.708 |  |
| Error | 24 | 1.509 |  |  |  | 331.164 | |  |  |  |
